# Supplementary material
Source: Research Square preprint supplement (doi:10.21203/rs.3.rs-9679727/v1)
Supplement: Supplementary file 1 [file ab3aa82ee1eae8b28dc73bac.docx]

**Supplemental materials**

Table of contents

1. Search terms used in four databases
2. Data extraction template
3. Full list of manuscripts
4. Search terms used in four databases (OVID Medline, EMBASE.com, Web of Science, and PubAg)

**<OVID Medline>**

One Health domain

- exp "One Health"/
- ("One Health" or "One-Health" or "one medicine" or "ecohealth" or "eco-health" or "planetary health").ab,ti,kf.
- (human* adj5 animal* adj5 environment*).ab,ti,kf. AND health.ab,ti,kf.

**AND**

Intervention domain

- (interven* or campaign* or vaccinat* or immuni* or deworm* or train* or engag* or trial* or random* or prevent* or educat* or effective* or implement*).ab,ti,kf.
- exp "clinical trial"/ or exp "education"/ or exp "Implementation Science"/ or exp "Vaccination"/ or exp "Immunization"/ or exp "Primary Prevention"/ or exp "Immunization Programs"/ or exp "Mass Vaccination"/

**Digital Object Identifiers (doi) of model One Health papers used to refine and confirm search terms**

"10.1016/j.ijid.2021.02.015".do.

"10.1016/j.parint.2016.11.013".do.

"10.1016/j.onehlt.2023.100612".do.

"10.1038/s41586-023-06313-z".do.

"10.1016/j.socscimed.2022.114726".do.

"10.3201/eid2709.203349".do.

"10.1093/trstmh/tru187".do.

"10.1179/2047773212Y.0000000056".do.

"10.1186/s13063-023-07098-2".do.

"10.1371/journal.pntd.0010318".do.
"10.1093/trstmh/trz114".do.

"10.1016/j.ijid.2023.01.037".do.

"10.1016/j.actatropica.2017.07.030".do.

**Search term used to identify search update from April 2024 to December 2026**(202404$ or 202405$ or 202406$ or 202407$ or 202408$ or 202409$ or 202410$ or 202411$ or 202412$ or 2025$ or 2026$).ed,dt,da,dp.

**<EMBASE.com>**

One Health domain

- 'one health'/exp
- 'one health':ti,ab,kw OR 'one-health':ti,ab,kw OR 'one medicine':ti,ab,kw OR 'ecohealth':ti,ab,kw OR 'eco-health':ti,ab,kw OR 'planetary health':ti,ab,kw
- (human* NEAR/5 animal* NEAR/5 environment*):ti,ab,kw AND health:ti,ab,kw

AND

Intervention domain

- 'clinical trial'/exp OR 'education'/exp OR 'implementation science'/exp OR 'vaccination'/exp OR 'immunization'/exp OR 'primary prevention'/exp OR 'immunization programs'/exp OR 'mass vaccination'/exp
- interven*:ti,ab,kw OR campaign*:ti,ab,kw OR vaccinat*:ti,ab,kw OR immuni*:ti,ab,kw OR deworm*:ti,ab,kw OR train*:ti,ab,kw OR engag*:ti,ab,kw OR trial*:ti,ab,kw OR random*:ti,ab,kw OR prevent*:ti,ab,kw OR educat*:ti,ab,kw OR effective*:ti,ab,kw OR implement*:ti,ab,kw

For the search update, we added “AND [01-04-2024]/sd” to the search terms above.

**<Web of Science>**

**One Health domain**

- TS=("One Health" OR "One-Health" OR "one medicine" OR "ecohealth" OR "eco-health" OR "planetary health")
- TS=(human* NEAR/5 animal* NEAR/5 environment*) AND TS=(health)

**Intervention domain**

- TS=('clinical trial' OR 'education' OR 'implementation science' OR 'vaccination' OR 'immunization' OR 'primary prevention' OR 'immunization programs' OR 'mass vaccination')
- TS=(interven* OR campaign* OR vaccinat* OR immuni* OR deworm* OR train* OR engag* OR trial* OR random* OR prevent* OR educat* OR effective* OR implement*)

1. Data extraction template (randomized control trial, non-randomized experimental study, cross-sectional/prevalence study, qualitative research, economic evaluation, quasi-experimental, and other), if an economic analysis was conducted, study type (KAP/education, programmatic, mass drug administration, surveillance, farming practices, and other),

(zoonosis/emerging and re-emerging diseases, antimicrobial resistance, food/water security/safety, policy, environmental contamination, climate change, human-animal-environment interaction benefits, and other)

(immigrative selection bias, emigrative selection bias, measurement error, ecological bias, confounding, and other)

(survey, interview, focus groups, investigator observation, clinical/laboratory sample/measurement, environmental sampling, GIS, surveillance systems/records, and other)

(pre-post, control/comparison, qualitative/perception, and other)

(categorical, numeric, and various types of regressions)

**<PubAg>**

Set the criteria to:

1. Any field contains

"One Health" OR "One-health" OR "One medicine" OR "planetary health" OR "ecohealth" OR "eco-health" OR "animal and human health" OR "diseases and disorders (animals and humans)"

AND

Any field contains

intervent* OR campaign* OR vaccinat* OR immun* OR deworm* OR train* OR engag* OR trial* OR random* or prevent* or educat* OR effective* OR implement* OR compar*

1. Material type = All items, Language = any language, Start date = left blank, End date = 26 April 2024

In the search update conducted in December 2025, this the date range was changed to

Start date = 1 April 2024, End date = 31 December 2026

1. Data extraction template

| Covidence # |  |
| --- | --- |
| Study ID |  |
| Title |  |
| Reviewer Name |  |
| Title |  |
| Journal |  |
| Year Published |  |
| DOI |  |
| Country in which the study conducted |  |
| Aim of study |  |
| (3) Study design |  |
| Economic Analysis? |  |
| Study Type |  |
| Study theme |  |
| Year(s) the study was conducted |  |
| Perceived Sources of Bias |  |
| Participating One Health Population(s) |  |
| (4) Human population(s) description |  |
| Total number of human participants |  |
| (5) Animal population(s) description |  |
| Total number of animal participants |  |
| (6) Environment population(s) description |  |
| Total number/volume/quantity of environmental components |  |
| (7) Measurement |  |
| Data Collection |  |
| Was data collection for each One Health group treated differently? |  |
| If yes, explain |  |
| (10) Ethics |  |
| Mentioned Pre-registration? |  |
| Inclusion/Exclusion criteria |  |
| Outcome Type |  |
| Analysis |  |
| Analysis Notes |  |
| Imputation? |  |
| Intervention |  |
| Pre-Post Outcomes |  |
| RCT Outcomes |  |
| Surveillance Outcomes |  |
| Summary of outcome |  |
| Effect Size (if applicable) |  |
| Reproducibility Assessment |  |
| Generalizability |  |
| Barriers to Implementation Stated by Authors |  |
| (17) Limitations Stated by Authors |  |
| Reviewer Perceived Limitations |  |
| One Health Level |  |
| Semi-Quantitative One Health Grading |  |
| Study funding sources |  |
| Conflict of Interests Stated by Authors |  |
| Reviewer Perceived Conflict of Interests |  |
| Overall Comments (if applicable) |  |

1. Full list of manuscripts

|  | Study ID | Title | Journal | Year Published | Digital Object Identifier (DOI) | Country |
| --- | --- | --- | --- | --- | --- | --- |
| 1 | Largo-Wight 2024 | Indoor Nature Contact: The Efficacy of a Nature Contact Intervention Inside the Home on Perceived Stress and Mood Among Women | Ecopsychology | 2024 | 10.1089/eco.2023.0073 | United States |
| 2 | King 2025 | Healthy Me, Healthy Planet: Evaluation of a pilot planetary health library program | Health Promotion Journal of Australia | 2025 | 10.1002/hpja.882 | Australia |
| 3 | Raghavendra 2025 | An ecological approach for pest suppression in tomato through integrated pest management (IPM): a case study from India | International Journal of Pest Management | 2025 | 10.1080/09670874.2025.2574603 | India |
| 4 | Alvarez-Nieto 2024 | Sustainability education in nursing degree for climate-smart healthcare: a quasi-experimental study | International Journal of Sustainability in Higher Education | 2024 | 10.1108/IJSHE-01-2024-0061 | Spain |
| 5 | Elhoshy 2025 | Evaluation of Planetary Health and Sustainable Healthcare Online Course for Undergraduate Medical Students: A Quasi-experimental Study | Medical Science Educator | 2025 | 10.1007/s40670-025-02462-0 | Egypt |
| 6 | Gonzales-Ortiz 2025 | Development of a Project to Strengthen Environmental Education in Educational Institutions in Bolivia: â€œEnvironmental Care with a One Health Approachâ€ | Sustainability | 2025 | 10.3390/su17083464 | Bolivia |
| 7 | Duguma 2025 | Improving donkey welfare in Ethiopia: Using a sustainable scalable integrated community-based approach | CABI One Health | 2025 | 10.1079/cabionehealth.2025.0009 | Ethiopia |
| 8 | Wishnie 2025 | Implementing a One Health curriculum across multiple colleges: Challenges and lessons learned | CABI One Health | 2025 | 10.1079/cabionehealth.2025.0020 | United States |
| 9 | AragÃ³n 2025 | A Gamified Teaching Proposal Using an Escape Box to Explore Marine Plastic Pollution | Sustainability | 2025 | 10.3390/su17167528 | Spain |
| 10 | Au-Yeung 2025 | Evaluating educational interventions on healthcare students' knowledge, attitudes, and practices (KAP) towards One Health in Hong Kong | CABI One Health | 2025 | 10.1079/cabionehealth.2025.0033 | Hong Kong Special Administrative Region |
| 11 | Fonseca-Martinez 2025 | Small pig stakeholders' knowledge of foreign animal diseases: Baseline knowledge and impact of an outreach session | Preventive Veterinary Medicine | 2025 | 10.1016/j.prevetmed.2025.106517 | United States |
| 12 | Kawano 2025 | In vivo ovarian temperature promotes the in vitro growth and developmental competence of oocytes derived from bovine early antral follicles | Theriogenology | 2025 | 10.1016/j.theriogenology.2025.117371 | Japan |
| 13 | Ogbeide 2025 | Flow Reduction in a Pesticideâ€‘Exposed Stream Mesocosm Affects Emerging Aquatic Insects and Alters Riparian Spider Communities | Archives of Environmental Contamination and Toxicology | 2025 | 10.1007/s00244-025-01146-5 | Germany |
| 14 | Galaz-Guajardo 2025 | Artificial Light at Night (ALAN) alters the behavior and physiology of a sandy beach isopod. Are these effects reversible? | Marine Environmental Research | 2025 | 10.1016/j.marenvres.2025.107130 | Chile |
| 15 | Vilardo 2025 | Behavioral effects of floor pens as environmental enrichment for laboratory rabbits (Oryctolagus cuniculus) | Applied Animal Behaviour Science | 2025 | 10.1016/j.applanim.2025.106629 | Brazil |
| 16 | Beyene 2025 | The Impact of Training Intervention on Levels of Indicator Bacteria and Prevalence of Selected Pathogens in Raw Milk From Smallholder Women Dairy Farmers in Central Ethiopia | Journal of Food Protection | 2024 | 10.1016/j.jfp.2024.100446 | Ethiopia |
| 17 | Sasaoka 2024 | Antimicrobial resistance and self-reported hand hygiene awareness before and after an infection prevention and control programme: A 7-year analysis in a small animal veterinary teaching hospital | The Veterinary Journal | 2024 | 10.1016/j.tvjl.2024.106154 | Japan |
| 18 | Iraguha 2024 | Mitigating antibiotic misuse in dairy farming systems and milk value chain market: Insights into practices, factors, and farmers education in Nyabihu district, Rwanda | One Health | 2024 | 10.1016/j.onehlt.2024.100843 | Rwanda |
| 19 | Bao 2024 | Economic assessment of an intervention strategy to reduce antimicrobial usage in small-scale chicken farms in Vietnam | One Health | 2024 | 10.1016/j.onehlt.2024.100699 | Vietnam |
| 20 | Tostain 2024 | The Primary Care and Environmental Health e-Learning Course to Integrate Environmental Health in General Practice: Before-and-After Feasibility Study | JMIR Formative Research | 2024 | 10.2196/56130 | France |
| 21 | Tourrette 2024 | An e-Learning Course to Train General Practitioners in Planetary Health: Pilot Intervention Study | JMIR Formative Research | 2024 | 10.2196/56138 | France |
| 22 | Sripa 2025 | One Health showcase from Asia: the Lawa modelâ€”a community-based approach to liver fluke control in Thailand | Science in One Health | 2025 | 10.1016/j.soh.2025.100108 | Thailand |
| 23 | TolentinoJunior 2025 | Evaluation of One Health approach measures implemented in response to the human rabies outbreak in the Maxakali Indigenous Land, Brazil | One Health Outlook | 2025 | 10.1186/s42522-025-00167-3 | Brazil |
| 24 | Kyere 2025 | Empowering dog owners and One Health teams to eliminate rabies: A community-Led approach from Techiman metropolitan, Ghana | One Health Outlook | 2025 | 10.1186/s42522-025-00164-6 | Ghana |
| 25 | Nadar 2025 | Antimicrobial resistance and One Health in the high school biology curriculum | Journal of Microbiology & Biology Education | 2025 | 10.1128/jmbe.00145-25 | United States |
| 26 | Amberger 2025 | Teaching on Climate Change and Healthâ€”Development and Implementation of an Online Elective Course for Medical Students | Journal of Medical Education and Curricular Development | 2025 | 10.1177/23821205251404316 | Germany |
| 27 | Kiuru 2023 | Entomological impact of mass administration of ivermectin and dihydroartemisinin-piperaquine in The  Gambia: a cluster-randomized controlled trial | Parasites & Vectors | 2022 | 10.1186/s13071-022-05557-4 | The Gambia |
| 28 | Hawes 2024 | Measuring the One Health impacts associated with creating access to veterinary care before and during the COVID-19 pandemic | Frontiers in Public Health | 2024 | 10.3389/fpubh.2024.1454866 | United States |
| 29 | Eichholtzer 2024 | The co-benefits of biodiversity citizen science for well-being and nature relatedness | Applied Psychology: Health and Well-Being | 2024 | 10.1111/aphw.12502 | Australia |
| 30 | Wright 2024 | Influencing attitudes towards antimicrobial use and resistance in  companion animalsâ€”the impact on pet owners of a short animation in a randomized controlled trial | JAC-Antimicrobial Resistance | 2024 | 10.1093/jacamr/dlae065 | United Kingdom |
| 31 | deSouza 2024 | Responsible ownership and health education can reduce the time of sporotrichosis treatment in domestic cats | Preventive Veterinary Medicine | 2024 | 10.1016/j.prevetmed.2024.106211 | Brazil |
| 32 | Stevens 2024 | Drawing a line from CO2 emissions to healthâ€”evaluation of medical studentsâ€™ knowledge and attitudes towards climate change and health following a novel serious game: a mixed-methods study | BMC Medical Education | 2024 | 10.1186/s12909-024-05619-4 | The Netherlands |
| 33 | Nyangi 2024 | Development and rapid assessment of Community-Based Health Education Package for the Control of Taenia solium Taeniasis/Cysticercosis in Tanzania | Tanzania Journal of Health Research | 2024 | 10.4314/thrb.v25i3.7 | Tanzania |
| 34 | Charoensuk 2024 | Integrated Oneâ€‘Health approach for prevention and control of Opisthorchis viverrini infection in rural Thailand: a 3â€‘year study | Parasitology Research | 2024 | 10.1007/s00436-024-08275-1 | Thailand |
| 35 | Collacchi 2024 | Promoting mental health in military veterans. Methodology and evaluation tools in a pilot study involving an Equine-Assisted Intervention | Rivista di psichiatria | 2024 |  | Italy |
| 36 | Landrum 2024 | Combating climate-induced health threats through Co-Constitutive Risk (CCR) Messaging: A One Health Communication approach | PLOS Neglected Tropical Diseases | 2024 | 10.1371/journal.pntd.0012676 | United States |
| 37 | Scicchitano 2024 | A 15-day pilot biodiversity intervention with horses in a farm system leads to gut microbiome rewilding in 10 urban Italian children | One Health | 2024 | 10.1016/j.onehlt.2024.100902 | Italy |
| 38 | Walekhwa 2024 | Strengthening anthrax outbreak response and preparedness: simulation and stakeholder education in Namisindwa district, Uganda | BMC Veterinary Research | 2024 | 10.1186/s12917-024-04289-0 | Uganda |
| 39 | Sayasone 2024 | Integrated Eco-Health approach significantly reduces helminth infections in endemic Khong islands with emphasis on Schistosoma mekongi | Infectious Diseases of Poverty | 2024 | 10.1186/s40249-024-01226-z | Lao PDR |
| 40 | Perez-Cruet 2025 | An Integrable and Interactive Session for Developing Action-Oriented Foundational Climate Change and Health Competencies in Medical Students | MedEdPortal | 2025 | 10.15766/mep_2374-8265.11560 | United States |
| 41 | Lilier 2025 | Targeting the gap of planetary health education in medical teaching: A student-led initiative develops the course â€œKlima-LIMETTEâ€ on climate change and health using simulated patients | GMS Journal for Medical Education | 2025 | 10.3205/zma001772 | Germany |
| 42 | Akankwatsa 2025 | Comparing vaccination coverage and dog population  demographics among four pilot dog rabies vaccination strategies in Uganda | Frontiers in Veterinary Science | 2025 | 10.3389/fvets.2025.1656563 | Uganda |
| 43 | Fatima 2025 | Potential of Earthworm Lampito mauritii in Vermiremediation of Heavy Metals (Co, Ni and Cd) from Different Combinations of Animal Dung with Kitchen Wastes | Research Journal of Pharmacy and Technology | 2025 | 10.52711/0974-360X.2025.00460 | India |
| 44 | Chau 2025 | Equipping our public health nutrition workforce to promote planetary health: a case example of tertiary education co-designed with students | Public Health Nutrition | 2024 | 10.1017/S1368980024002611 | Australia |
| 45 | Ngoumou 2025 | An interactive course program on nutrition for medical students: interdisciplinary development and mixed-methods evaluation | BMC Medical Education | 2025 | 10.1186/s12909-024-06596-4 | Germany |
| 46 | LeÃ£o 2025 | Efficacy of a multicomponent nature-based intervention on well-being and environmental engagement: A randomized clinical trial | Environment International | 2025 | 10.1016/j.envint.2025.109286 | Brazil |
| 47 | Gil-Serna 2025 | Citizen Science to Raise Antimicrobial Resistance Awareness in the Community: The MicroMundo Project in Spain and Portugal | Microbial Biotechnology | 2025 | 10.1111/1751-7915.70123 | Spain & Portugal |
| 48 | Herrmann 2025 | Acceptability of health-only versus climate-and-health framings in lifestyle-related climate-sensitive health counselling: results of a randomised survey experiment in Germany | Lancet Planetary Health | 2025 |  | Germany |
| 49 | Ni 2025 | Sustainable control and integrated management through a one health approach to mitigate vector-borne disease | One Health | 2025 | 10.1016/j.onehlt.2025.101018 | China |
| 50 | Sripa 2025 | Integrated opisthorchiasis control through the EcoHealth/one health approach: 15 years of success and experiences with the Lawa model | One Health | 2025 | 10.1016/j.onehlt.2025.101006 | Thailand |
| 51 | McNeilly 2025 | Reduction of tungiasis prevalence, intensity, and morbidity during a two-year long community-based tungiasis control project in a hyperendemic region in Karamoja, Uganda | PLOS Neglected Tropical Diseases | 2025 | 10.1371/journal.pntd.0013149 | Uganda |
| 52 | DeStefano 2025 | Effective mitigation of an outbreak of New Delhi metallo-Î²-lactamaseâ€“producing Escherichia coli infections in a small animal veterinary teaching hospital | Journal of American Veterinary Medical Association | 2025 | 10.2460/javma.24.09.0572 | United States |
| 53 | McKeown 2025 | Inclusion of planetary health in developmental biology education | Developmental Biology | 2025 | 10.1016/j.ydbio.2025.04.015 | Australia |
| 54 | Bor 2025 | Rabies control via co-creation: A model for sustainable one health interventions | PLOS Neglected Tropical Diseases | 2025 | 10.1371/journal.pntd.0013350 | Kenya |
| 55 | Levett-Jones 2025 | Investigating the impact of the â€˜healthy planet, healthy peopleâ€™ educational boardgame: A multicentre pre-test â€“ post-test study | Nurse Education Today | 2025 | 10.1016/j.nedt.2025.106753 | Australia |
| 56 | Block 2025 | Co-developing a planetary health module for pediatrics: a student-led initiative with peer teaching and evaluation of planetary health literacy | Public Health | 2025 | 10.1016/j.puhe.2025.105829 | Germany |
| 57 | Andria-Mananjara 2025 | Evaluation of a One Health public health program based on minimum inputs to control Taenia solium in Madagascar | PLOS Neglected Tropical Diseases | 2025 | 10.1371/journal.pntd.0013624 | Madagascar |
| 58 | Prakobwong 2025 | One Health integrated strategies for sustainable control of Opisthorchis viverrini infections in rural endemic areas of Thailand | Infectious Diseases of Poverty | 2025 | 10.1186/s40249-025-01315-7 | Thailand |
| 59 | Onyango 2025 | Through the eyes of the participant: using photovoice to understand the experiences and effects of ivermectin MDA in the context of the BOHEMIA clinical trial in Kwale, Kenya | Malaria Journal | 2025 | 10.1186/s12936-025-05320-x | Kenya |
| 60 | Ton 2023 | Effects of heat waves on telomere dynamics and parental brooding effort in nestlings of the zebra finch (Taeniopygia castanotis) transitioning from ectothermy to endothermy | Molecular Ecology | 2023 | 10.1111/mec.17064 | Australia |
| 61 | SalahUddinKhan 2010 | Use of Infrared Camera to Understand Batsâ€™ Access to Date Palm Sap: Implications for Preventing Nipah Virus Transmission | EcoHealth | 2010 | 10.1007/s10393-010-0366-2 | Bangladesh |
| 62 | Portilla 2020 | Herbicide treatment alters the effects of water hyacinth on larval mosquito abundance | Journal of Vector Ecology | 2020 | 10.1111/jvec.12374 | United States |
| 63 | Pempek 2022 | The Impact of Antimicrobial Stewardship Training on Calf Producersâ€™ Knowledge, Treatment Behaviors and Quantified Antimicrobial Use | Microorganisms | 2022 | 10.3390/microorganisms10081525 | United States |
| 64 | Nahar 2017 | A Controlled Trial to Reduce the Risk of Human Nipah Virus Exposure in Bangladesh | EcoHealth | 2017 | 10.1007/s10393-017-1267-4 | Bangladesh |
| 65 | Lauridsen 2019 | Impacts of using the electronic-health education program â€˜The Vicious Wormâ€™ for prevention of Taenia solium | Acta Tropica | 2019 | 10.1016/j.actatropica.2019.02.018 | Tanzania |
| 66 | Jagger 2019 | Early Adoption of an Improved Household Energy System in Urban Rwanda | EcoHealth | 2019 | 10.1007/s10393-018-1391-9 | Rwanda |
| 67 | Hancke 2014 | Environmental Health Education in Schools as Strategy for Rodent Control: An Experience in a Shantytown of Buenos Aires, Argentina | EcoHealth | 2014 | 10.1007/s10393-013-0879-6 | Argentina |
| 68 | Han 2022 | Impact of risk-based partial vaccination on clinical incidence and seroprevalence of foot and mouth disease in Lao PDR | Transboundary and Emerging Diseases | 2021 | 10.1111/tbed.14299 | Lao PDR |
| 69 | Finlayson 2018 | Efficacy of seawater for washing oiled birds during an oil spill response | Marine Pollution Bulletin | 2018 | 10.1016/j.marpolbul.2017.10.080 | New Zealand |
| 70 | Fillion 2011 | Neurotoxic Sequelae of Mercury Exposure: An Intervention and Follow-up Study in the Brazilian Amazon | EcoHealth | 2011 | 10.1007/s10393-011-0710-1 | Brazil |
| 71 | Bloomfield 2022 | Research Participation Influences Willingness to Reduce Zoonotic Exposure in Uganda | EcoHealth | 2022 | 10.1007/s10393-022-01589-5 | Uganda |
| 72 | Allan 2023 | Interventions to reduce camel and small ruminant young stock morbidity and mortality in Ethiopia | Preventive Veterinary Medicine | 2023 | 10.1016/j.prevetmed.2023.106005 | Ethiopia |
| 73 | Abadi 2022 | Dog-Assisted Physical Activity Intervention in Children with Autism Spectrum Disorder: A Feasibility and Efficacy Exploratory Study | AnthrozoÃ¶s | 2022 | 10.1080/08927936.2022.2027091 | Canada |
| 74 | Verlinden 2023 | Increased temperature during incubation increases the sociality of male broilers in later life | Applied Animal Behaviour Science | 2023 | 10.1016/j.applanim.2022.105815 | Belgium |
| 75 | Verlinden 2022 | Influence of temperature during incubation on the mRNA levels of temperature sensitive ion channels in the brain of broiler chicken embryos | Comparative Biochemistry and Physiology, Part A | 2022 | 10.1016/j.cbpa.2022.111199 | Belgium |
| 76 | Young 2014 | Impacts on Rural Livelihoods in Cambodia Following Adoption of Best Practice Health and Husbandry Interventions by Smallholder Cattle Farmers | Transboundary and Emerging Diseases | 2014 | 10.1111/tbed.12193 | Cambodia |
| 77 | Luu 2018 | Community Participatory Interventions to Improve Farmer Knowledge and Practices of Household Biogas Unit Operation in Ha Nam Province, Vietnam | Journal of Public Health Management and Practice | 2018 | 10.1097/PHH.0000000000000727 | Viet Nam |
| 78 | Wu 2019 | Influenza H5/H7 Virus Vaccination in Poultry and Reduction of Zoonotic Infections, Guangdong Province, China, 2017â€“18 | Emerging Infectious Diseases | 2019 | 10.3201/eid2501.181259 | China |
| 79 | Valderrama-Eslava 2009 | Enforced herbivory on Canavalia ensiformis and Tithonia diversifolia and its effects on leaf-cutting ants, Atta cephalotes | Journal of Applied Entomology | 2009 | 10.1111/j.1439-0418.2009.01421.x | Colombia |
| 80 | Dijkstra 2022 | Lowering Red Meat and Processed Meat Consumption With Environmental, Animal Welfare, and Health Arguments in Italy: An Online Experiment | Frontiers in Psychology | 2022 | 10.3389/fpsyg.2022.877911 | Italy |
| 81 | Vasiljevic 2024 | Can warning labels communicating the environmental impact of meat reduce meat consumption? Evidence from two multiple treatment reversal experiments in college dining halls | Food Quality and Preference | 2024 | 10.1016/j.foodqual.2023.105084 | United Kingdom |
| 82 | Gut 2018 | The effect of human interaction on guinea pig behavior in animal-assisted therapy | Journal of Veterinary Behavior | 2018 | 10.1016/j.jveb.2018.02.004 | Switzerland |
| 83 | Aengwanich 2014 | Intervention to Improve Biosecurity System of Poultry Production Clusters (PPCs) in Thailand | Agriculture | 2014 | 10.3390/agriculture4030231 | Thailand |
| 84 | Ash 2017 | Controlling Taenia solium and soil transmitted helminths in a northern Lao PDR village: Impact of a triple dose albendazole regime | Acta Tropica | 2017 | 10.1016/j/actatropica.2015.05.018 | Lao PDR |
| 85 | Kurniawan 2021 | The effectiveness of the One Health SMART approach on dengue vector control in Majalengka, Indonesia | Journal of Health Research | 2021 | 10.1108/JHR-07-2019-0162 | Indonesia |
| 86 | Dunne 2022 | Effectiveness of an online module: climate-change and sustainability in clinical practice | BMC Medical Education | 2022 | 10.1186/s12909-022-03734-8 | United Kingdom |
| 87 | Mombeck 2024 | The Impact of a School Dog on Childrenâ€™s Social Inclusion and Social Climate in a School Class | European Journal of Investigation in Health, Psychology and Education | 2023 | 10.3390/ejihpe14010001 | Germany |
| 88 | Oropeza-Moe 2017 | Zinc oxide enriched peat influence Escherichia coli infection related diarrhea, growth rates, serum and tissue zinc levels in Norwegian piglets around weaning: five case herd trials | Porcine Health Management | 2017 | 10.1186/s40813-017-0060-7 | Norway |
| 89 | PiÃ±ero 2014 | Progression of Coxiella burnetii infection after implementing a two-year vaccination program in a naturally infected dairy cattle herd | Acta Veterinaria Scandinavica | 2014 | 10.1186/s13028-014-0047-1 | Spain |
| 90 | Friel 2015 | Improving Health Information Literacy of Early Adolescents Using a Lead Poisoning Curriculum | Journal of Consumer Health on the Internet | 2015 | 10.1080/15398285.2015.1089392 | United States |
| 91 | Olmert 2021 | The Comfort Dog Project of Northern Uganda: An Innovative Canine-Assisted Psychosocial Trauma Recovery Programme | Intervention, Journal of Mental Health and Psychosocial Support in Conflict Affected Areas | 2021 | 10.4103/INTV.INTV_16_20 | Uganda |
| 92 | Ghugey 2022 | The effects of health education intervention on promoting knowledge, beliefs and preventive behaviors on brucellosis among rural population in Nagpur district of Maharashtra state, India | Journal of Family Medicine and Primary Care | 2022 | 10.4103/jfmpc.jfmpc_1562_21 | India |
| 93 | Makingi 2023 | Community Health-Education Intervention Trial against Human Taenia solium Taeniasis/Cysticercosis in Central and Southern Zones of Tanzania | Pathogens | 2023 | 10.3390/pathogens12070955 | Tanzania |
| 94 | Mustaffa-Kamal 2023 | Effectiveness of Field Simulation Approach for Problem-Based Learning That Incorporates the One Health Concept | Journal of Veterinary Medical Education | 2024 | 10.3138/jvme-2022-013 | Malaysia |
| 95 | Rashid 2020 | Using field training in indigenous communities as a method of creating awareness of the one health concept among Malaysian university students: a non-experimental pre and post-test intervention study | One Health Outlook | 2020 | 10.1186/s42522-020-00023-6 | Malaysia |
| 96 | Plummer 2005 | Impact of Invasive Water Hyacinth (Eichhornia crassipes) on Snail Hosts of Schistosomiasis in Lake Victoria, East Africa | EcoHealth | 2005 | 10.1007/s10393-004-0104-8 | Tanzania |
| 97 | FernÃ¡ndez 2007 | Implementation and Evaluation of an Integrated Program for Rodent Control in a Shantytown of Buenos Aires City, Argentina | EcoHealth | 2007 | 10.1007/s10393-007-0122-4 | Argentina |
| 98 | Bukirwa 2009 | Short report: Assessing the impact of indoor residual spraying on malaria morbidity using a sentinel site surveillance system in Western Uganda | American Journal of Tropical Medicine and Hygiene | 2009 | 10.4269/ajtmh.2009.09-0126 | Uganda |
| 99 | Kang'ethe 2012 | Development and delivery of evidence-based messages to reduce the risk of zoonoses in Nairobi, Kenya | Tropical Animal Health and Production | 2012 | 10.1007/s11250-012-0205-2 | Kenya |
| 100 | Arunachalam 2013 | Community-based control of Aedes aegypti by adoption of eco-health methods in Chennai City, India | Pathogens and Global Health | 2012 | 10.1179/2047773212Y.0000000056 | India |
| 101 | Kittayapong 2013 | Application of eco-friendly tools and eco-bio-social strategies to control dengue vectors in urban and peri-urban settings in Thailand | Pathogens and Global Health | 2013 | 10.1179/2047773212Y.0000000059 | Thailand |
| 102 | Pellecer 2013 | Vector Blood Meals Are an Early Indicator of the Effectiveness of the Ecohealth Approach in Halting Chagas Transmission in Guatemala | American Journal of Tropical Medicine and Hygiene | 2013 | 10.4269/ajtmh.12-0458 | Guatemala |
| 103 | Lucero 2013 | Ecohealth Interventions Limit Triatomine Reinfestation following Insecticide Spraying in La Brea, Guatemala | American Journal of Tropical Medicine and Hygiene | 2013 | 10.4269/ajtmh.12-0448 | Guatemala |
| 104 | Heinrich 2014 | Public Health Campaign to Promote Hand Hygiene Before Meals in a College of Veterinary Medicine | Journal of Veterinary Medical Education | 2014 | 10.3138/jvme.0913-124R1 | United States |
| 105 | Masthi 2014 | Epidemiology and prevention of animal bite and human rabies in a rural community-One health experiment | Asian Pacific Journal of Tropical Disease | 2014 | 10.1016/S2222-1808(14)60495-3 | India |
| 106 | Lardeux 2015 | Experimental control of Triatoma infestans in poor rural villages of Bolivia through community participation | Transactions of the Royal Society of Tropical Medicine & Hygiene | 2015 | 10.1093/trstmh/tru205 | Bolivia |
| 107 | Lu 2016 | A One Health Message about Bats Increases Intentions to Follow Public Health Guidance on Bat Rabies | PLOS One | 2016 | 10.1371/journal.pone.0156205 | United States |
| 108 | Braae 2016 | Effect of National Schistosomiasis Control Programme on Taenia solium taeniosis and porcine cysticercosis in rural communities of Tanzania | Parasite Epidemiology and Control | 2016 | 10.1016/j.parepi.2016.08.004 | Tanzania |
| 109 | Braae 2017 | Effect of repeated mass drug administration with praziquantel and track and treat of taeniosis cases on the prevalence of taeniosis in Taenia solium endemic rural communities of Tanzania | Acta Tropica | 2017 | 10.1016/j.actatropica.2015.10.012 | Tanzania |
| 110 | Hetherington 2017 | Participatory science and innovation for improved sanitation and hygiene: process and outcome evaluation of project SHINE, a school-based intervention in Rural Tanzania | BMC Public Health | 2017 | 10.1186/s12889-017-4100-7 | Tanzania |
| 111 | MagaÃ±a-Valladares 2018 | Design and efficacy of an Ecohealth competency-based course on the prevention and control of vector diseases in Latin America | Salud PÃºblica de MÃ©xico | 2018 | 10.21149/8607 | Colombia, El Salvador, Venezuela, Panama, Mexico, Nicaragua |
| 112 | Pham 2018 | Evaluation of an Ecohealth Approach to Public Health Intervention in Ha Nam, Vietnam | Journal of Public Health Management & Practice | 2018 | 10.1097/PHH.0000000000000732 | Vietnam |
| 113 | Hobbs 2018 | Preliminary assessment of the computer-based Taenia solium educational program â€˜The Vicious Wormâ€™ on knowledge uptake in primary school students in rural areas in eastern Zambia | Tropical Medicine and International Health | 2018 | 10.1111/tmi.13029 | Zambia |
| 114 | Berrian 2018 | A community-based One Health education program for disease risk mitigation at the human-animal interface | One Health | 2018 | 10.1016/j.onehlt.2017.11.002 | South Africa |
| 115 | Waleckx 2018 | Non-randomized controlled trial of the long-term efficacy of an Ecohealth intervention against Chagas disease in Yucatan, Mexico | PLOS Neglected Tropical Diseases | 2018 | 10.1371/journal.pntd.0006605 | Mexico |
| 116 | Kabululu 2018 | Effectiveness of an integrated intervention in the control of endo- and ectoparasites of pigs kept by smallholder farmers in Mbeya rural and Mbozi districts, Tanzania | Veterinary Parasitology: Regional Studies and Reports | 2018 | 10.1016/j.vprsr.2018.03.009 | Tanzania |
| 117 | Alamo-HernÃ¡ndez 2019 | Environmental Health Promotion of a Contaminated Site in Mexico | EcoHealth | 2019 | 10.1007/s10393-019-01407-5 | Mexico |
| 118 | Lankester 2019 | An integrated health delivery platform, targeting soil-transmitted helminths (STH) and canine mediated human rabies, results in cost savings and increased breadth of treatment for STH in remote communities in Tanzania | BMC Public Health | 2019 | 10.1186/s12889-019-7737-6 | Tanzania |
| 119 | Alvarez-Hernandez 2020 | Community-based prevention of epidemic Rocky Mountain spotted fever among minority populations in Sonora, Mexico, using a One Health approach | Transactions of the Royal Society of Tropical Medicine and Hygiene | 2019 | 10.1093/trstmh/trz114 | Mexico |
| 120 | Fasina 2020 | Where and when to vaccinate? Interdisciplinary design and evaluation of the 2018 Tanzanian anti-rabies campaign | International Journal of Infectious Diseases | 2020 | 10.1016/j.ijid.2020.03.037 | Tanzania |
| 121 | Chiu 2020 | Teaching Wildlife Disease Outbreak Response Through a Collaborative One Health Workshop | Journal of Veterinary Medical Education | 2020 | 10.3138/jvme.2018-0020 | United States |
| 122 | Larkins 2020 | An economic case study of the control of dog-mediated rabies by an animal welfare organisation in Jaipur, India | Preventive Veterinary Medicine | 2020 | 10.1016/j.prevetmed.2020.105120 | India |
| 123 | Riley 2020 | Evaluating Impacts of a One Health Approach to Companion Animal Health and Management in a Remote Aboriginal Community in the Northern Territory, Australia | Animals | 2020 | 10.3390/ani10101790 | Australia |
| 124 | Franco-MartÃ­nez 2020 | Teaching the basics of the One Health concept to undergraduate veterinary students | Research in Veterinary Science | 2020 | 10.1016/j.rvsc.2020.09.022 | Spain |
| 125 | ElBerbri 2020 | Evaluation of integrated control of three dog transmitted zoonoses: Rabies, visceral leishmaniasis and cystic echinococcosis, in Morocco | Acta Tropica | 2020 | 10.1016/j.actatropica.2020.105689 | Morocco |
| 126 | Cringoli 2021 | An integrated approach to control Cystic Echinococcosis in southern Italy | Veterinary Parasitology | 2021 | 10.1016/j.vetpar.2021.109347 | Italy |
| 127 | Niese 2021 | Evaluating the Potential Benefit of a Combined Weight Loss Program in Dogs and Their Owners | Frontiers in Veterinary Science | 2021 | 10.3389/fvets.2021.653920 | Netherlands |
| 128 | Scandurra 2021 | An Animal-Assisted Education Intervention with Dogs to Promote Emotion Comprehension in Primary School Childrenâ€”The Federico II Model of Healthcare Zooanthropology | Animals | 2021 | 10.3390/ani11061504 | Italy |
| 129 | Corrales 2021 | Improving the knowledge of high school students about zoonotic diseases from pets in MedellÃ­n-Colombia | Veterinary World | 2021 | 10.14202/vetworld.2021.3091-3098 | Colombia |
| 130 | Hawes 2021 | Measuring Changes in Perceptions of Access to Pet Support Care in Underserved Communities | Frontiers in Veterinary Science | 2021 | 10.3389/fvets.2021.745345 | United States |
| 131 | Sharma 2022 | Comparing the Effectiveness of Different Approaches to Raise Awareness About Antimicrobial Resistance in Farmers and Veterinarians of India | Frontiers in Public Health | 2022 | 10.3389/fpubh.2022.837594 | India |
| 132 | Powell 2022 | One Health clinic promotes veterinarian-client trust among underserved pet owners and provides learning opportunities for veterinary students | Journal of the American Veterinary Medical Association | 2022 | 10.2460/javma.21.06.0274 | United States |
| 133 | Pereira 2022 | The long-term impact of an Ecohealth intervention: Entomological data suggest the interruption of Chagas disease transmission in southeastern Guatemala | Acta Tropica | 2022 | 10.1016/j.actatropica.2022.106655 | Guatemala |
| 134 | Gibson 2022 | Elimination of human rabies in Goa, India through an integrated One Health approach | Nature Communications | 2022 | 10.1038/s41467-022-30371-y | India |
| 135 | Scollo 2023 | Biosecurity and Hygiene Procedures in Pig Farms: Effects of a Tailor-Made Approach as Monitored by Environmental Samples | Animals | 2023 | 10.3390/ani13071262 | Italy |
| 136 | Weinberg 2023 | Chagas prevention and control in an endemic area from the Argentinian Gran Chaco Region: Data from 14 years of uninterrupted intervention | PLOS Neglected Tropical Diseases | 2023 | 10.1371/journal.pntd.0011410 | Argentina |
| 137 | Temme 2023 | Less meat in the shopping basket. The effect on meat purchases of higher prices, an information nudge and the combination: a randomised controlled trial | BMC Public Health | 2022 | 10.1186/s12889-022-13535-9 | Netherlands |
| 138 | Santana 2023 | The Effectiveness of Topical Dimethicone Together with a One Health Approach for the Control of Tungiasis in the SanumÃ¡s Communities, Yanomami Territory, Amazon Rainforest: A Real-World Stud | Tropical Medicine and Infectious Disease | 2023 | 10.3390/tropicalmed8110489 | Brazil |
| 139 | Kohnle 2023 | Amplification of avian influenza virus circulation along poultry marketing chains in Bangladesh: A controlled field experiment | Preventive Veterinary Medicine | 2024 | 10.1016/j.prevetmed.2024.106302 | Bangladesh |
| 140 | Sanders 2024 | Advancing Health Security and Disease Eradication Through Peace and Health: A Mali Case Study | Health Security | 2024 | 10.1089/hs.2023.0091 | Mali |
| 141 | Cadmus 2024 | A community action network-based intervention for improving knowledge of zoonoses among wildlife hunters and traders in Epe, Lagos, Nigeria | PLOS One | 2024 | 10.1371/journal.pone.0300237 | Nigeria |
| 142 | CÃ©lleri-Gomezcoello 2024 | Impact of the Â´Alforja Educativaâ€™ on Ecuadorian schoolchildrenâ€™s knowledge of bacteria, antibiotics, and antibiotic resistance, a pretest-posttest study | BMC Public Health | 2024 | 10.1186/s12889-024-18340-0 | Ecuador |
| 143 | Zandavalli 2024 | Systems approach in planetary health education for medical students: a mixed methods study | BMC Medical Education | 2024 | 10.1186/s12909-024-05341-1 | Brazil |
| 144 | Pattnaik 2024 | One Health intervention for elimination of anthrax in an endemic district of Odisha: A baseline and endline study | One Health | 2024 | 10.1016/j.onehlt.2024.100729 | India |
| 145 |  | Impact of farmer education on their knowledge, attitudes, and practices in southern Tanzania: a case for Taenia solium control | Livestock Research for Rural Development | 2011 | N/A | Tanzania |
| 146 | Ross 2023 | First bovine vaccine to prevent human schistosomiasis - a cluster randomised Phase 3 clinical trial | International Journal of Infectious Diseases | 2023 | 10.1016/j.ijid.2023.01.037 | The Philippines |
| 147 | Caprara 2015 | Entomological impact and social participation in dengue control: a cluster randomized trial in Fortaleza, Brazil | Transactions of the Royal Society of Tropical Medicine and Hygiene | 2015 | 10.1093/trstmh/tru187 | Brazil |
| 148 | O'Neal 2021 | Geographically Targeted Interventions versus Mass Drug Administration to Control Taenia solium Cysticercosis, Peru | Emerging Infectious Diseases | 2021 | 10.3201/eid2709.203349 | Peru |
| 149 | Rohr 2023 | A planetary health innovation for disease, food and water challenges in Africa | Nature | 2023 | 10.1038/s41586-023-06313-z | Senegal |
| 150 | Sripa 2017 | The Lawa model: A sustainable, integrated opisthorchiasis control program using the EcoHealth approach in the Lawa Lake region of Thailand | Parasitology International | 2017 | 10.1016/j.parint.2016.11.013 | Thailand |
| 151 | Pawestri 2021 | Seasonal prevalence, risk factors, and One Health intervention for prevention of intestinal parasitic infection in underprivileged communities on the Thai-Myanmar border | International Journal of Infectious Diseases | 2021 | 10.1016/j.ijid.2021.02.015 | Thailand |
